# Supplementary material
Source: PubMed Central journal article supplement (PMC6730565)

**Supplementary Table 1. Summary of numbers of RNA edits observed in all RNA-seq experiments**

| Figure                                      | Cell        | BE                                   | gRNA                                | Sort          | Replicate     | A-to-I (for ABE) or C-to-U (for CBE) | Other | A-to-I or C-to-U (%) | Mean Editing Efficiency | Median Editing Efficiency |
|---------------------------------------------|-------------|--------------------------------------|-------------------------------------|---------------|---------------|--------------------------------------|-------|----------------------|-------------------------|---------------------------|
| Fig. 1b                                     | HEK293T     | ABEmax (data from Ref <sup>5</sup> ) | HEK site 2 (ABE site 1)             | Top 5%        | Rep. 1        | <b>37,059</b>                        | 87    | 99.77                | 22.5                    | 18.8                      |
|                                             |             |                                      |                                     |               | Rep. 2        | <b>16,049</b>                        | 201   | 98.76                | 22.1                    | 17.7                      |
|                                             |             |                                      |                                     |               | Rep. 3        | <b>27,706</b>                        | 246   | 99.12                | 22.1                    | 18.3                      |
|                                             |             | ABEmax                               | HEK site 2 (ABE site 1)             | All GFP       | Rep. 1        | <b>29,597</b>                        | 193   | 99.35                | 21.8                    | 18.2                      |
|                                             |             |                                      |                                     |               | Rep. 2        | <b>10,047</b>                        | 231   | 97.75                | 17.2                    | 15.7                      |
|                                             |             |                                      |                                     |               | Rep. 3        | <b>26,552</b>                        | 251   | 99.06                | 18.5                    | 16.9                      |
|                                             |             | miniABEmax                           | HEK site 2 (ABE site 1)             | All GFP       | Rep. 1        | <b>29,841</b>                        | 177   | 99.41                | 18.4                    | 16.9                      |
|                                             |             |                                      |                                     |               | Rep. 2        | <b>1,080</b>                         | 238   | 81.94                | 19.3                    | 17.1                      |
|                                             |             |                                      |                                     |               | Rep. 3        | <b>2,203</b>                         | 383   | 85.19                | 20.4                    | 18.2                      |
|                                             |             | miniABEmax-K20A/R21A                 | HEK site 2 (ABE site 1)             | All GFP       | Rep. 1        | <b>2,069</b>                         | 315   | 86.79                | 19.6                    | 17.9                      |
|                                             |             |                                      |                                     |               | Rep. 2        | <b>971</b>                           | 216   | 81.80                | 19.3                    | 17.3                      |
|                                             |             |                                      |                                     |               | Rep. 3        | <b>1,654</b>                         | 333   | 83.24                | 20.5                    | 18.2                      |
|                                             |             | miniABEmax-V82G                      | HEK site 2 (ABE site 1)             | All GFP       | Rep. 1        | <b>1,172</b>                         | 276   | 80.94                | 21.3                    | 19.0                      |
|                                             |             |                                      |                                     |               | Rep. 2        | <b>28,099</b>                        | 197   | 99.30                | 22.2                    | 18.5                      |
|                                             |             |                                      |                                     |               | Rep. 3        | <b>26,571</b>                        | 238   | 99.11                | 22.0                    | 18.3                      |
|                                             |             | ABEmax                               | ABE site 16                         | All GFP       | Rep. 1        | <b>26,948</b>                        | 238   | 99.12                | 21.8                    | 18.1                      |
|                                             |             |                                      |                                     |               | Rep. 2        | <b>23,187</b>                        | 216   | 99.08                | 18.5                    | 16.9                      |
|                                             |             |                                      |                                     |               | Rep. 3        | <b>13,897</b>                        | 202   | 98.57                | 17.7                    | 16.1                      |
| miniABEmax                                  | ABE site 16 | All GFP                              | Rep. 1                              | <b>19,907</b> | 232           | 98.85                                | 17.9  | 16.5                 |                         |                           |
|                                             |             |                                      | Rep. 2                              | <b>1,376</b>  | 292           | 82.49                                | 20.2  | 17.9                 |                         |                           |
|                                             |             |                                      | Rep. 3                              | <b>1,338</b>  | 291           | 82.14                                | 19.5  | 17.6                 |                         |                           |
| miniABEmax-K20A/R21A                        | ABE site 16 | All GFP                              | Rep. 1                              | <b>1,696</b>  | 295           | 85.18                                | 19.1  | 17.1                 |                         |                           |
|                                             |             |                                      | Rep. 2                              | <b>936</b>    | 243           | 79.39                                | 19.9  | 17.6                 |                         |                           |
|                                             |             |                                      | Rep. 3                              | <b>1,224</b>  | 336           | 78.46                                | 18.9  | 16.7                 |                         |                           |
| miniABEmax-V82G                             | ABE site 16 | All GFP                              | Rep. 1                              | <b>1,159</b>  | 269           | 81.16                                | 20.5  | 18.2                 |                         |                           |
|                                             |             |                                      | Rep. 2                              | <b>15,909</b> | 202           | 98.75                                | 22.2  | 17.9                 |                         |                           |
|                                             |             |                                      | Rep. 3                              | <b>31,521</b> | 229           | 99.28                                | 22.1  | 18.4                 |                         |                           |
| ABEmax                                      | NT          | All GFP                              | Rep. 1                              | <b>24,326</b> | 196           | 99.20                                | 21.6  | 17.8                 |                         |                           |
|                                             |             |                                      | Rep. 2                              | <b>8,748</b>  | 379           | 95.85                                | 17.6  | 16.1                 |                         |                           |
|                                             |             |                                      | Rep. 3                              | <b>29,540</b> | 244           | 99.18                                | 18.8  | 17.1                 |                         |                           |
| miniABEmax                                  | NT          | All GFP                              | Rep. 1                              | <b>25,426</b> | 261           | 98.98                                | 18.4  | 16.9                 |                         |                           |
|                                             |             |                                      | Rep. 2                              | <b>690</b>    | 206           | 77.01                                | 17.6  | 15.8                 |                         |                           |
|                                             |             |                                      | Rep. 3                              | <b>2,102</b>  | 325           | 86.61                                | 20.6  | 18.2                 |                         |                           |
| miniABEmax-K20A/R21A                        | NT          | All GFP                              | Rep. 1                              | <b>2,191</b>  | 265           | 89.21                                | 19.2  | 17.4                 |                         |                           |
|                                             |             |                                      | Rep. 2                              | <b>762</b>    | 143           | 84.20                                | 18.3  | 16.7                 |                         |                           |
|                                             |             |                                      | Rep. 3                              | <b>1,634</b>  | 304           | 84.31                                | 21.0  | 18.2                 |                         |                           |
| miniABEmax-V82G                             | NT          | All GFP                              | Rep. 1                              | <b>1,582</b>  | 282           | 84.87                                | 18.6  | 16.7                 |                         |                           |
|                                             |             |                                      | Rep. 2                              | <b>423</b>    | 202           | 67.68                                | 19.3  | 17.4                 |                         |                           |
|                                             |             |                                      | Rep. 3                              | <b>270</b>    | 175           | 60.67                                | 17.6  | 16.0                 |                         |                           |
| HEK293T                                     | GFP         | --                                   | All GFP                             | Rep. 1        | <b>363</b>    | 168                                  | 68.36 | 19.2                 | 17.3                    |                           |
|                                             |             |                                      |                                     | Rep. 2        | <b>31</b>     | 131                                  | 19.14 | 18.0                 | 15.8                    |                           |
|                                             |             |                                      |                                     | Rep. 3        | <b>30,435</b> | 8                                    | 99.97 | 23.4                 | 18.0                    |                           |
| hA3A-BE3                                    | RNF2        | Top 5%                               | MF-matched to top 5% BE3 expression | Rep. 1        | <b>27,190</b> | 8                                    | 99.97 | 23.3                 | 18.0                    |                           |
|                                             |             |                                      |                                     | Rep. 2        | <b>32,402</b> | 11                                   | 99.97 | 23.2                 | 17.8                    |                           |
|                                             |             |                                      |                                     | Rep. 3        | <b>98</b>     | 101                                  | 49.25 | 19.6                 | 16.1                    |                           |
| eA3A-BE3                                    | RNF2        | Top 5%                               | MF-matched to top 5% BE3 expression | Rep. 1        | <b>72</b>     | 87                                   | 45.28 | 20.7                 | 17.6                    |                           |
|                                             |             |                                      |                                     | Rep. 2        | <b>113</b>    | 78                                   | 59.16 | 22.2                 | 17.3                    |                           |
|                                             |             |                                      |                                     | Rep. 3        | <b>45</b>     | 201                                  | 18.29 | 17.2                 | 16.7                    |                           |
| hAID-BE3                                    | RNF2        | Top 5%                               | MF-matched to top 5% BE3 expression | Rep. 1        | <b>34</b>     | 144                                  | 19.10 | 15.1                 | 15.1                    |                           |
|                                             |             |                                      |                                     | Rep. 2        | <b>70</b>     | 234                                  | 23.03 | 16.1                 | 15.4                    |                           |
|                                             |             |                                      |                                     | Rep. 3        | <b>15</b>     | 118                                  | 11.28 | 15.7                 | 15.4                    |                           |
| Target-AID                                  | RNF2        | Top 5%                               | MF-matched to top 5% BE3 expression | Rep. 1        | <b>19</b>     | 132                                  | 12.58 | 17.1                 | 16.3                    |                           |
|                                             |             |                                      |                                     | Rep. 2        | <b>10</b>     | 60                                   | 14.29 | 14.0                 | 14.6                    |                           |
|                                             |             |                                      |                                     | Rep. 3        | <b>235</b>    | 90                                   | 72.31 | 14.4                 | 13.0                    |                           |
| BE3-R33A (data from Ref <sup>5</sup> )      | RNF2        | Top 5%                               | MF-matched to top 5% BE3 expression | Rep. 1        | <b>355</b>    | 111                                  | 76.18 | 17.0                 | 15.4                    |                           |
|                                             |             |                                      |                                     | Rep. 2        | <b>195</b>    | 57                                   | 77.38 | 14.4                 | 13.4                    |                           |
|                                             |             |                                      |                                     | Rep. 3        | <b>20</b>     | 77                                   | 20.62 | 13.6                 | 15.4                    |                           |
| BE3-R33A/K34A (data from Ref <sup>5</sup> ) | RNF2        | Top 5%                               | MF-matched to top 5% BE3 expression | Rep. 1        | <b>18</b>     | 95                                   | 15.93 | 20.3                 | 16.4                    |                           |
|                                             |             |                                      |                                     | Rep. 2        | <b>7</b>      | 42                                   | 14.29 | 17.3                 | 13.6                    |                           |
|                                             |             |                                      |                                     | Rep. 3        | <b>7</b>      | 42                                   | 14.29 | 17.3                 | 13.6                    |                           |

**Supplementary Table 2. Summary of numbers of BE-induced self-edits and gRNA edits**

| Cell          | BE                   | gRNA                    | Sort        | Replicate | Number of BE self-edits |          |            |            | Number of gRNA edits |   |
|---------------|----------------------|-------------------------|-------------|-----------|-------------------------|----------|------------|------------|----------------------|---|
|               |                      |                         |             |           | Nonsense                | Missense | Synonymous | Total      |                      |   |
| HEK293T       | WT BE3               | <i>RNF2</i>             | All GFP     | Rep. 1    | 11                      | 44       | 70         | <b>125</b> | 0                    |   |
|               |                      |                         |             | Rep. 2    | 8                       | 25       | 51         | <b>84</b>  | 0                    |   |
|               |                      |                         |             | Rep. 3    | 10                      | 38       | 57         | <b>105</b> | 0                    |   |
|               | WT BE3               | <i>EMX1</i>             | All GFP     | Rep. 1    | 6                       | 32       | 56         | <b>94</b>  | 0                    |   |
|               |                      |                         |             | Rep. 2    | 9                       | 29       | 45         | <b>83</b>  | 0                    |   |
|               |                      |                         |             | Rep. 3    | 6                       | 31       | 50         | <b>87</b>  | 0                    |   |
| HEK293T       | WT BE3               | <i>RNF2</i>             | Top 5%      | Rep. 1    | 14                      | 55       | 80         | <b>149</b> | 0                    |   |
|               |                      |                         |             | Rep. 2    | 15                      | 64       | 98         | <b>177</b> | 0                    |   |
|               |                      |                         |             | Rep. 3    | 15                      | 57       | 83         | <b>155</b> | 0                    |   |
|               | BE3-R33A             | <i>RNF2</i>             | Top 5%      | Rep. 1    | 0                       | 0        | 0          | <b>0</b>   | 0                    |   |
|               |                      |                         |             | Rep. 2    | 0                       | 0        | 0          | <b>0</b>   | 0                    |   |
|               |                      |                         |             | Rep. 3    | 0                       | 0        | 0          | <b>0</b>   | 0                    |   |
|               | BE3-R33A/K34A        | <i>RNF2</i>             | Top 5%      | Rep. 1    | 0                       | 0        | 0          | <b>0</b>   | 0                    |   |
|               |                      |                         |             | Rep. 2    | 0                       | 0        | 0          | <b>0</b>   | 0                    |   |
|               |                      |                         |             | Rep. 3    | 0                       | 0        | 0          | <b>0</b>   | 0                    |   |
|               | HepG2                | WT BE3                  | <i>RNF2</i> | Top 5%    | Rep. 1                  | 10       | 37         | 66         | <b>113</b>           | 0 |
|               |                      |                         |             |           | Rep. 2                  | 10       | 35         | 56         | <b>101</b>           | 0 |
|               |                      |                         |             |           | Rep. 3                  | 8        | 45         | 62         | <b>115</b>           | 0 |
| BE3-R33A      |                      | <i>RNF2</i>             | Top 5%      | Rep. 1    | 0                       | 0        | 0          | <b>0</b>   | 0                    |   |
|               |                      |                         |             | Rep. 2    | 0                       | 0        | 0          | <b>0</b>   | 0                    |   |
|               |                      |                         |             | Rep. 3    | 0                       | 0        | 0          | <b>0</b>   | 0                    |   |
| BE3-R33A/K34A |                      | <i>RNF2</i>             | Top 5%      | Rep. 1    | 0                       | 0        | 0          | <b>0</b>   | 0                    |   |
|               |                      |                         |             | Rep. 2    | 0                       | 0        | 0          | <b>0</b>   | 0                    |   |
|               |                      |                         |             | Rep. 3    | 0                       | 0        | 0          | <b>0</b>   | 0                    |   |
| HEK293T       |                      | hA3A-BE3                | <i>RNF2</i> | Top 5%    | Rep. 1                  | 6        | 5          | 17         | <b>28</b>            | 0 |
|               |                      |                         |             |           | Rep. 2                  | 6        | 5          | 17         | <b>28</b>            | 0 |
|               |                      |                         |             |           | Rep. 3                  | 6        | 6          | 19         | <b>31</b>            | 0 |
|               | eA3A-BE3             | <i>RNF2</i>             | Top 5%      | Rep. 1    | 0                       | 0        | 0          | <b>0</b>   | 0                    |   |
|               |                      |                         |             | Rep. 2    | 0                       | 0        | 0          | <b>0</b>   | 0                    |   |
|               |                      |                         |             | Rep. 3    | 0                       | 0        | 0          | <b>0</b>   | 0                    |   |
|               | hAID-BE3             | <i>RNF2</i>             | Top 5%      | Rep. 1    | 0                       | 0        | 0          | <b>0</b>   | 0                    |   |
|               |                      |                         |             | Rep. 2    | 0                       | 0        | 0          | <b>0</b>   | 0                    |   |
|               |                      |                         |             | Rep. 3    | 0                       | 0        | 0          | <b>0</b>   | 0                    |   |
|               | Target-AID           | <i>RNF2</i>             | Top 5%      | Rep. 1    | 0                       | 0        | 0          | <b>0</b>   | 0                    |   |
|               |                      |                         |             | Rep. 2    | 0                       | 0        | 0          | <b>0</b>   | 0                    |   |
|               |                      |                         |             | Rep. 3    | 0                       | 0        | 0          | <b>0</b>   | 0                    |   |
| HEK293T       | ABEmax               | HEK site 2 (ABE site 1) | All GFP     | Rep. 1    | —                       | 36       | 3          | <b>39</b>  | 0                    |   |
|               |                      |                         |             | Rep. 2    | —                       | 54       | 3          | <b>57</b>  | 0                    |   |
|               |                      |                         |             | Rep. 3    | —                       | 60       | 4          | <b>64</b>  | 0                    |   |
|               | miniABEmax           | HEK site 2 (ABE site 1) | All GFP     | Rep. 1    | —                       | 33       | 2          | <b>35</b>  | 1                    |   |
|               |                      |                         |             | Rep. 2    | —                       | 53       | 4          | <b>57</b>  | 1                    |   |
|               |                      |                         |             | Rep. 3    | —                       | 61       | 3          | <b>64</b>  | 1                    |   |
|               | miniABEmax-K20A/R21A | HEK site 2 (ABE site 1) | All GFP     | Rep. 1    | —                       | 0        | 1          | <b>1</b>   | 0                    |   |
|               |                      |                         |             | Rep. 2    | —                       | 2        | 1          | <b>3</b>   | 0                    |   |
|               |                      |                         |             | Rep. 3    | —                       | 1        | 1          | <b>2</b>   | 1                    |   |
|               | miniABEmax-V82G      | HEK site 2 (ABE site 1) | All GFP     | Rep. 1    | —                       | 0        | 0          | <b>0</b>   | 1                    |   |
|               |                      |                         |             | Rep. 2    | —                       | 0        | 0          | <b>0</b>   | 1                    |   |
|               |                      |                         |             | Rep. 3    | —                       | 0        | 0          | <b>0</b>   | 1                    |   |
| HEK293T       | ABEmax               | ABE site 16             | All GFP     | Rep. 1    | —                       | 51       | 3          | <b>54</b>  | 0                    |   |
|               |                      |                         |             | Rep. 2    | —                       | 48       | 4          | <b>52</b>  | 1                    |   |
|               |                      |                         |             | Rep. 3    | —                       | 48       | 2          | <b>50</b>  | 0                    |   |
|               | miniABEmax           | ABE site 16             | All GFP     | Rep. 1    | —                       | 41       | 3          | <b>44</b>  | 1                    |   |
|               |                      |                         |             | Rep. 2    | —                       | 33       | 2          | <b>35</b>  | 1                    |   |
|               |                      |                         |             | Rep. 3    | —                       | 37       | 2          | <b>39</b>  | 1                    |   |
|               | miniABEmax-K20A/R21A | ABE site 16             | All GFP     | Rep. 1    | —                       | 0        | 1          | <b>1</b>   | 1                    |   |
|               |                      |                         |             | Rep. 2    | —                       | 0        | 1          | <b>1</b>   | 1                    |   |
|               |                      |                         |             | Rep. 3    | —                       | 1        | 1          | <b>2</b>   | 1                    |   |
|               | miniABEmax-V82G      | ABE site 16             | All GFP     | Rep. 1    | —                       | 0        | 0          | <b>0</b>   | 1                    |   |
|               |                      |                         |             | Rep. 2    | —                       | 0        | 0          | <b>0</b>   | 1                    |   |
|               |                      |                         |             | Rep. 3    | —                       | 0        | 0          | <b>0</b>   | 1                    |   |
| HEK293T       | ABEmax               | NT                      | All GFP     | Rep. 1    | —                       | 37       | 2          | <b>39</b>  | 0                    |   |
|               |                      |                         |             | Rep. 2    | —                       | 54       | 4          | <b>58</b>  | 0                    |   |
|               |                      |                         |             | Rep. 3    | —                       | 59       | 4          | <b>63</b>  | 0                    |   |
|               | miniABEmax           | NT                      | All GFP     | Rep. 1    | —                       | 29       | 2          | <b>31</b>  | 1                    |   |
|               |                      |                         |             | Rep. 2    | —                       | 63       | 5          | <b>68</b>  | 1                    |   |
|               |                      |                         |             | Rep. 3    | —                       | 62       | 4          | <b>66</b>  | 1                    |   |
|               | miniABEmax-K20A/R21A | NT                      | All GFP     | Rep. 1    | —                       | 1        | 1          | <b>2</b>   | 0                    |   |
|               |                      |                         |             | Rep. 2    | —                       | 2        | 1          | <b>3</b>   | 0                    |   |
|               |                      |                         |             | Rep. 3    | —                       | 2        | 1          | <b>3</b>   | 0                    |   |
|               | miniABEmax-V82G      | NT                      | All GFP     | Rep. 1    | —                       | 0        | 0          | <b>0</b>   | 1                    |   |
|               |                      |                         |             | Rep. 2    | —                       | 0        | 0          | <b>0</b>   | 1                    |   |
|               |                      |                         |             | Rep. 3    | —                       | 0        | 0          | <b>0</b>   | 1                    |   |

## Supplementary Note 1.

The ABE 7.10 variant, on which ABEmax is based, was derived through a successive series of engineering steps with different variants numbered sequentially as alterations were made<sup>1</sup>. The second (wild-type) TadA domain was added to ABE 2.6 and then the subsequent 47 iterations of optimization that led to ABE 7.10 were performed on a dimeric TadA architecture (Extended Data Fig. 1 of Ref. 1). ABE 2.1 (which lacked the additional wild-type TadA) possessed comparable editing efficiencies to the heterodimeric architecture of the same variant, ABE 2.10 (Fig. 3a of Ref. 1). Thus, even at this early stage of the engineering process, the additional wild-type TadA domain was not required to enable programmable A-to-G DNA base editing. In addition, the subsequent 47 stages of directed evolution and optimization leading to the final variant ABE 7.10 might have yielded a TadA\* variant with greatly improved DNA editing capabilities that might therefore even be less dependent on the presence of a linked TadA domain. Finally, because ABEmax is a codon optimized version of the ABE7.10 variant, it is possible that the enhanced expression of this base editor might partially rescue a moderate loss of DNA base editing activity.

### Reference:

1. Gaudelli, N. M. *et al.* Programmable base editing of A\*T to G\*C in genomic DNA without DNA cleavage. *Nature* **551**, 464-471, doi:10.1038/nature24644 (2017).

# Supplementary Note 2. FACS gating examples for GFP cell sorting conditions.

Please find attached representative FACS plot data (batch analysis output) demonstrating how control and base editor expressing HEK293T cells were sorted. All data were generated at the MGH Molecular Pathology Flow Cytometry Core Facility on a BD FACSAria II cytometer using BD FACSDiva software (version 6.1.3). We exclusively sorted GFP+ cells.

The depicted dot plots were used for doublet exclusion as well as gating for the cell population and the GFP+ cells being sorted. FITC (x-axis) is a fluorochrome that closely matches the spectral characteristics of GFP.

## FACS Raw Data Analysis Legends

BD FACSDiva 6.1.3  
Batch Analysis

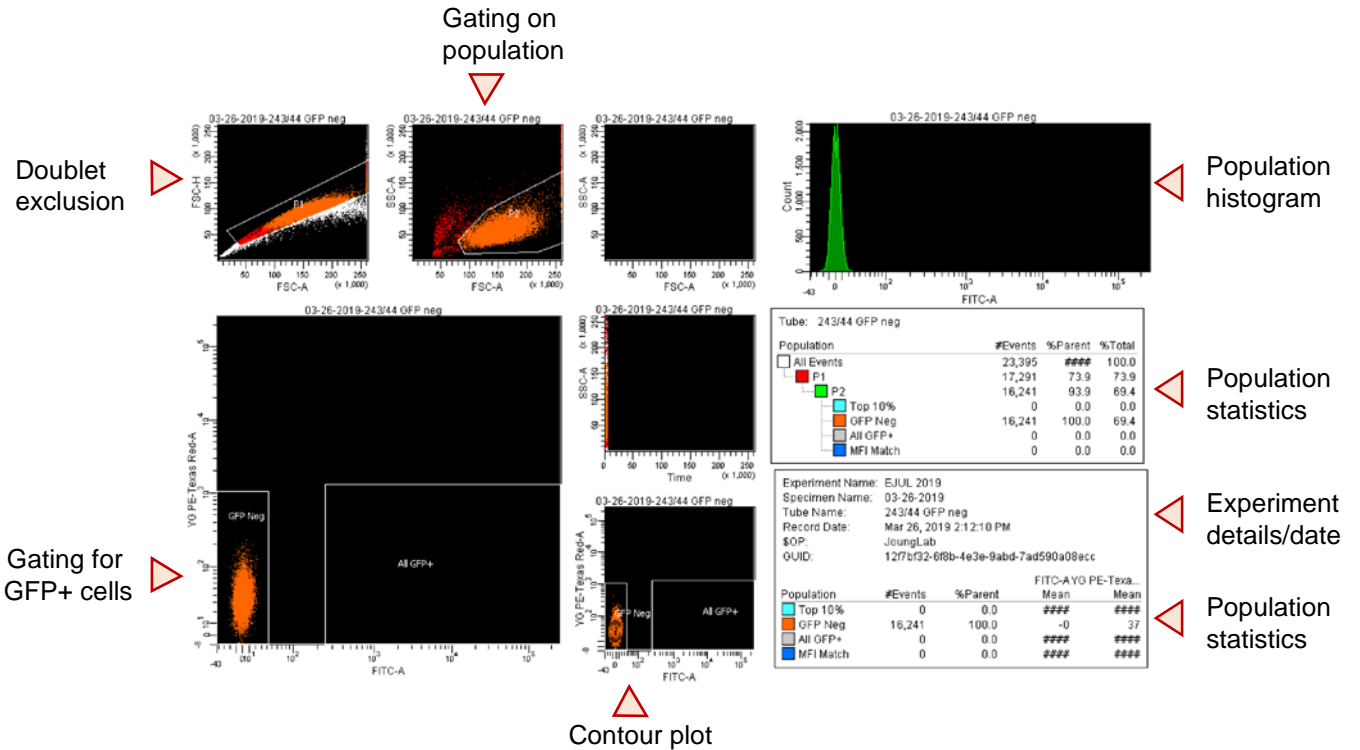

## HEK293T Negative Control (no transfection)

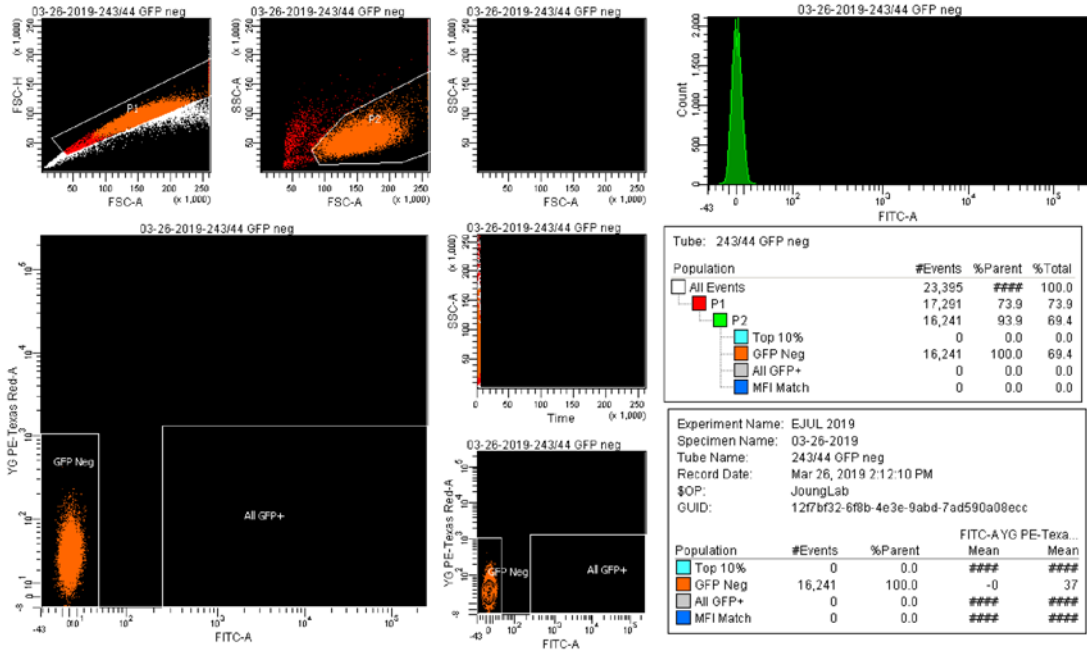

## HEK293T All GFP+ nCas9 Control for ABE

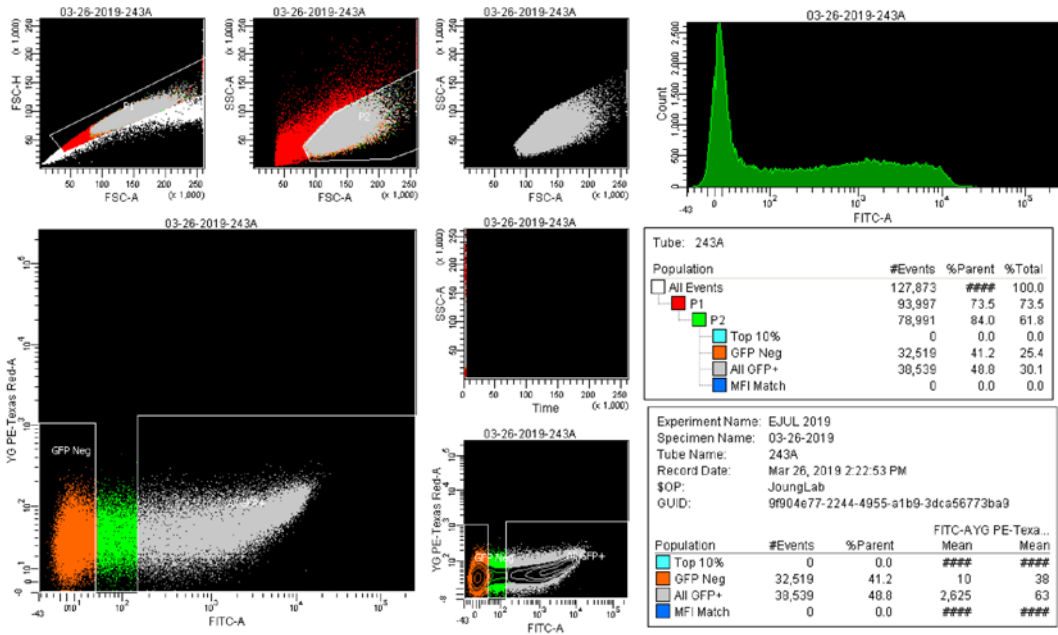

HEK293T All GFP+  
ABEmax treated

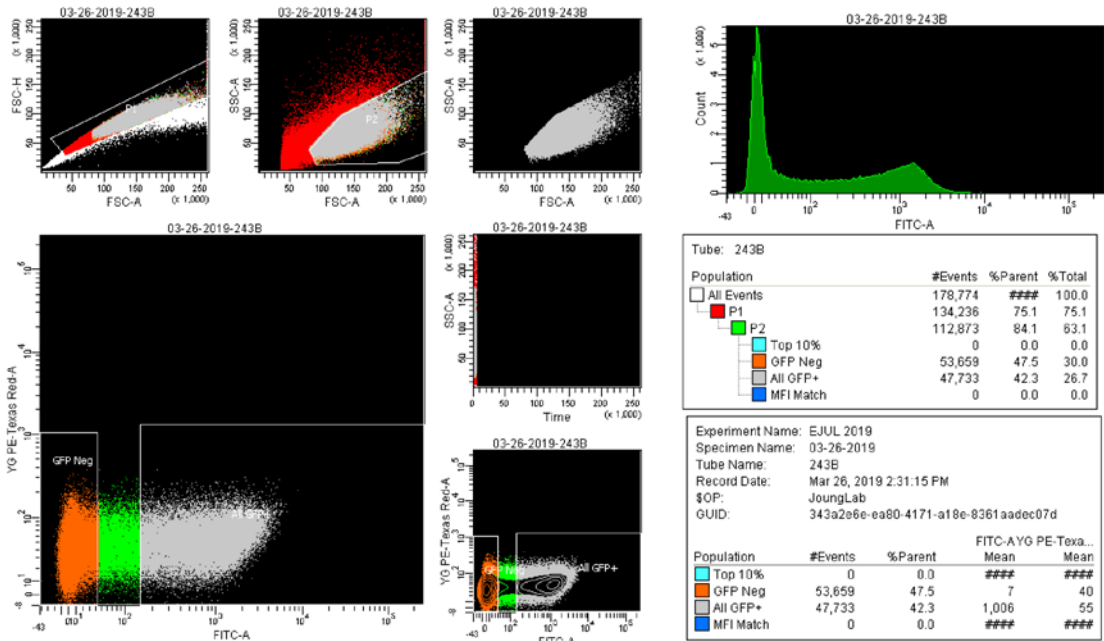

HEK293T All GFP+  
miniABEmax treated

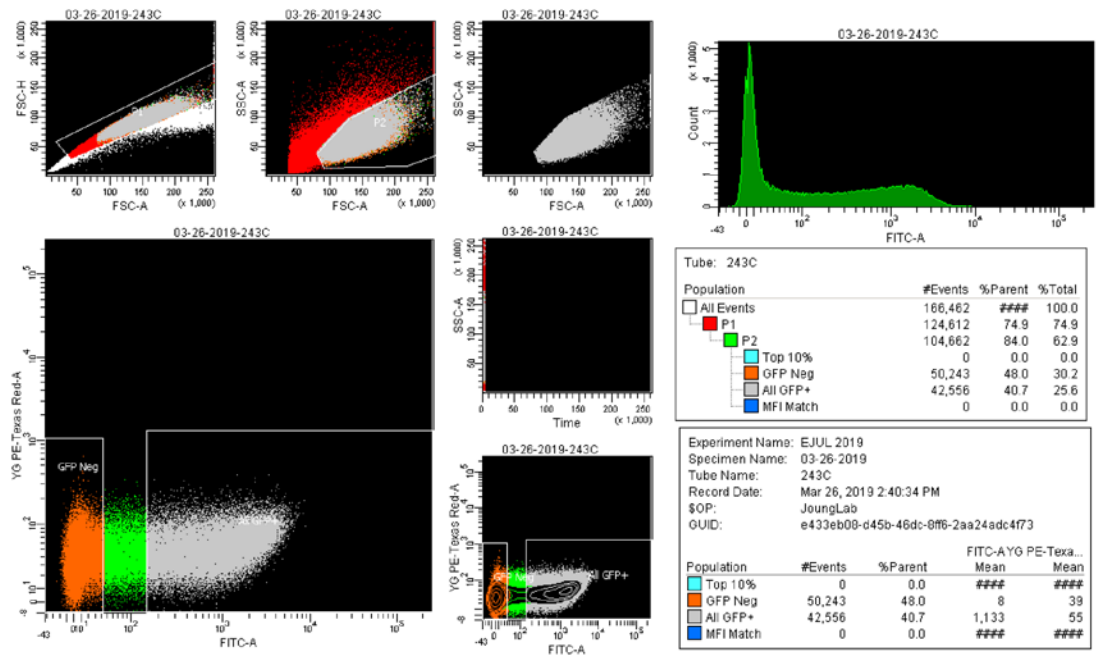

## HEK293T Top 5%-matched nCas9 Control for CBE

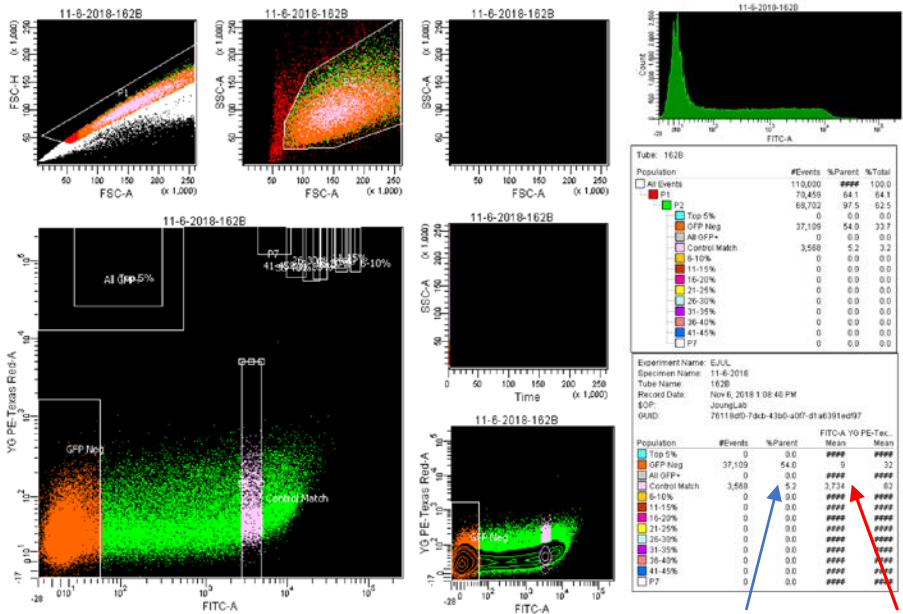

5% population with **GeoMean (MFI)** matched to top 5% BE-treated cells (see next slide)

## HEK293T Top 5% CBE-treated

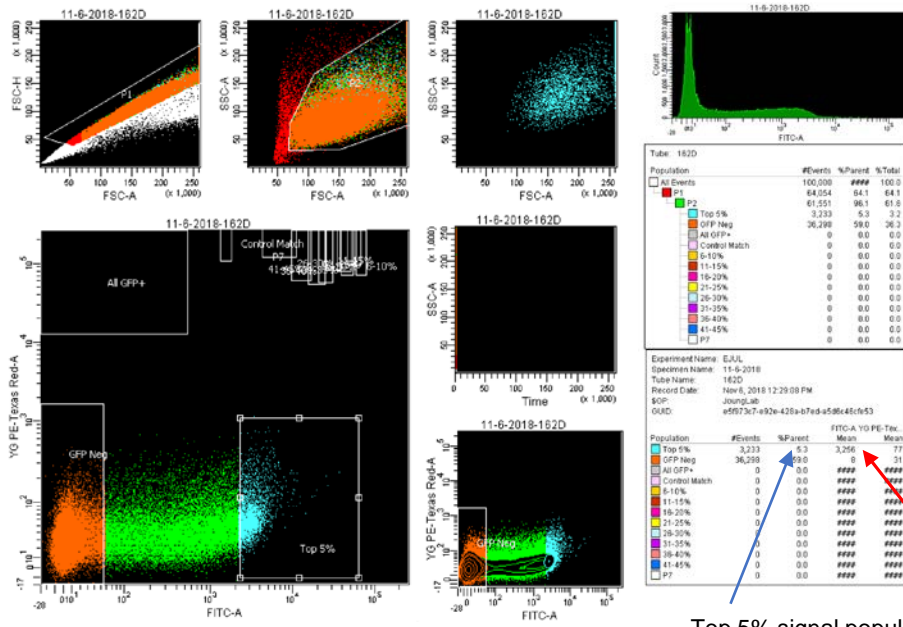

Top 5% signal population & **GeoMean (MFI)**

# HEK293T Top 5%-matched GFP Control

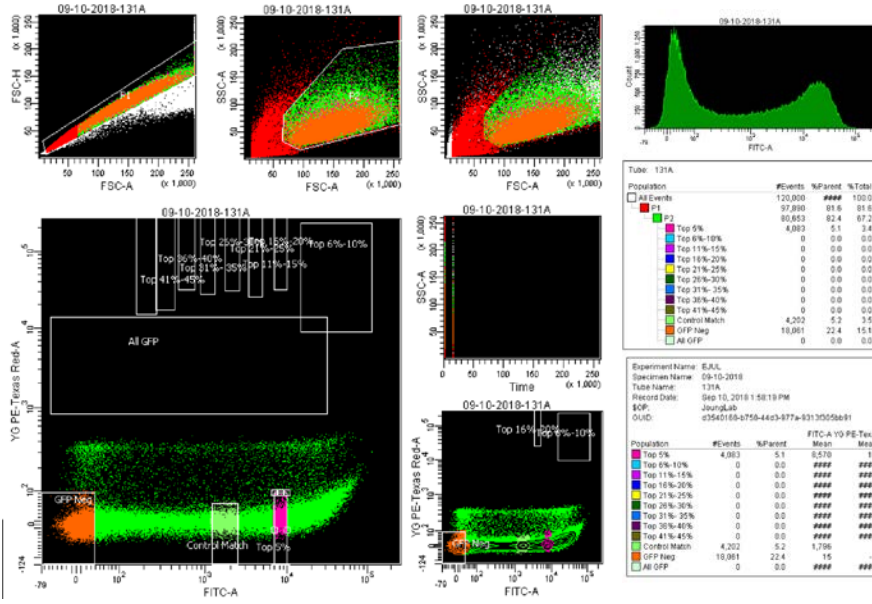

Supplement: NIHMS1535598-supplement-3.pdf [file NIHMS1535598-supplement-3.pdf]
